# Supplementary material for: Pegilodecakin as monotherapy or in combination with anti‐PD‐1 or tyrosine kinase inhibitor in heavily pretreated patients with advanced renal cell carcinoma: Final results of cohorts A, G, H and I of IVY Phase I study
Source: PubMed Central journal article supplement — Int J Cancer. 2021 Mar 24;149(2):403–8. doi: 10.1002/ijc.33556 (PMC8251721; doi:10.1002/ijc.33556), 2021-03-24
Supplement: IJC-149-403-s001.pdf [file IJC-149-403-s001.pdf]

**Pegilodecakin as monotherapy or in combination with anti-PD-1 or tyrosine kinase inhibitor in heavily pretreated patients with advanced renal cell carcinoma (RCC): Final results of cohorts A, G, H, and I of IVY Phase I study**

Nizar M. Tannir<sup>1</sup>, Kyriakos P. Papadopoulos<sup>2</sup>, Deborah J. Wong<sup>3</sup>, Raid Aljumaily<sup>4</sup>, Annie Hung<sup>5</sup>, Manuel Afable<sup>5</sup>, Jong Seok Kim<sup>5</sup>, David Ferry<sup>6</sup>, Alexandra Drakaki<sup>3</sup>, Johanna Bendell<sup>7</sup>, Aung Naing<sup>1</sup>

Table of contents:

|                                                      |   |
|------------------------------------------------------|---|
| 1. Supplemental Table 1. Prior lines of Therapy..... | 2 |
| 2. Supplemental Figure 1. The cohorts of IVY.....    | 3 |

**Supplemental Table 1. Prior lines of therapy**

| Drug                                    | PEG monotherapy (N=24) |    |     | PEG+pazopanib (N=4) |    |     | PEG+anti-PD-1 (N=38) |    |     |
|-----------------------------------------|------------------------|----|-----|---------------------|----|-----|----------------------|----|-----|
|                                         | 1L                     | 2L | ≥3L | 1L                  | 2L | ≥3L | 1L                   | 2L | ≥3L |
| Targeted Therapy <sup>a</sup>           | 18                     | 14 | 11  | 1                   | 1  |     | 28                   | 18 | 12  |
| Axitinib                                | 3                      | 1  | 6   |                     |    |     | 2                    | 3  | 5   |
| Bevacizumab (combination) <sup>b</sup>  |                        | 3  | 2   |                     |    |     | 3                    | 2  | 3   |
| Everolimus                              | 1                      | 4  | 3   |                     | 1  |     | 2                    | 4  | 4   |
| Pazopanib                               | 9                      | 2  | 4   |                     |    |     | 5                    | 3  | 2   |
| Sorafenib                               |                        |    | 3   |                     |    |     | 3                    |    |     |
| Sunitinib (combination) <sup>c</sup>    | 5                      | 2  | 1   | 1                   |    |     | 13                   | 3  | 2   |
| Temsirolimus                            | 1                      | 2  | 2   |                     |    |     |                      | 1  |     |
| Chemotherapy (combination) <sup>d</sup> | 1                      | 1  | 3   |                     |    |     |                      | 1  | 1   |
| Targeted therapy + chemotherapy         |                        |    | 1   | 1                   |    |     | 1                    | 1  |     |
| Immunotherapy                           | 3                      | 3  | 1   |                     | 1  |     | 3                    | 1  | 2   |
| IL-10                                   |                        |    |     |                     |    |     |                      |    | 2   |
| IL-2                                    | 3                      |    |     |                     |    |     | 3                    |    |     |
| NKTR214                                 |                        |    |     |                     |    |     |                      | 1  |     |
| Nivolumab                               |                        | 1  |     |                     |    |     |                      |    | 1   |
| Interferon                              |                        | 1  |     |                     |    |     |                      |    |     |
| Durvalumab                              |                        |    | 1   |                     |    |     |                      |    |     |
| Ipilimumab                              |                        | 1  |     |                     |    |     |                      |    |     |
| Utomilumab+pembro                       |                        |    |     |                     | 1  |     |                      |    |     |
| Clinical Trial                          | 1                      | 1  | 2   | 1                   |    |     |                      | 1  | 3   |

<sup>a</sup>Other targeted therapies with occurrence of  $\leq 2$  in a given cohort included the following: HIF-2 $\alpha$  inhibitor; tivozanib; and cabozantinib. <sup>b</sup>Therapies in combination with bevacizumab included c-MET inhibitor, everolimus, sorafenib, interferon alpha, vorinostat, and sodium phenylbutyrate. <sup>c</sup>Therapies in combination with sunitinib included CXCR4 antagonist, lenalidomide, and vaccine. <sup>d</sup>Other agents included the following: zoledronate; denosumab; gemcitabine; capecitabine; anastrozole; docetaxel; carboplatin; trastuzumab; dose-dense methotrexate, vinblastine, doxorubicin, and cisplatin (ddMVAC); durvalumab; laxbepilone; benzaldehyde dimethane sulfonate (DMS612). Pembro, pembrolizumab; PEG, pegilodecakin.

**Supplemental Figure 1. The cohorts of IVY: pegilodecakin in advanced solid tumors.**

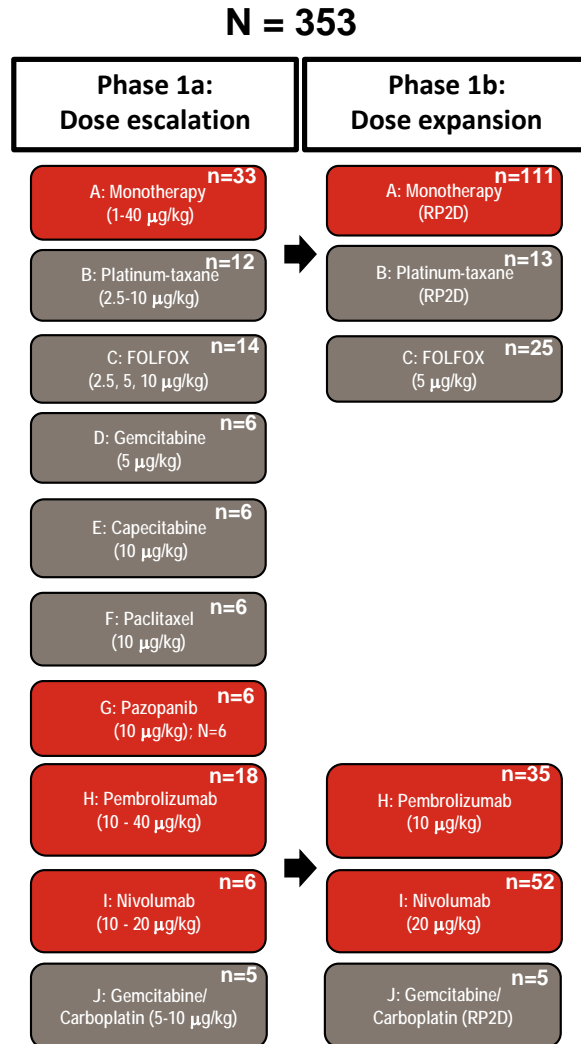

The diagram displays the combination therapies for all cohorts included in the study IVY. A total of 353 patients were enrolled in the trial, which investigated pegilodecakin as monotherapy (cohort A) or with combination therapies in a variety of advanced solid tumors (melanoma, castrate resistant prostate cancer, ovarian cancer, renal cell carcinoma, colorectal carcinoma, pancreatic carcinoma, and non-small-cell lung carcinoma) in 10 cohorts: cohort A (pegilodecakin monotherapy); cohort B (pegilodecakin + carboplatin or cisplatin and paclitaxel or docetaxel); cohort C (pegilodecakin + FOLFOX); cohort D (pegilodecakin + gemcitabine and nab-paclitaxel); cohort E (pegilodecakin + capecitabine); cohort F (pegilodecakin + paclitaxel); cohort G (pegilodecakin + pazopanib); cohort H (pegilodecakin + pembrolizumab); cohort I (pegilodecakin + nivolumab); and cohort J (pegilodecakin + gemcitabine and carboplatin). The doses listed are for pegilodecakin. All patients with RCC are included in the cohorts

color-coated “red.” The number of patients with RCC were as follows: cohort A (n=24); cohort G (n=4); cohort H (n=9); cohort I (n=29).
